## A new species of *Physoptychis* (Brassicaceae) from central Anatolia, Turkey

NECATİ ÇELİK, H. ASKIN AKPULAT\* and EROL DÖNMEZ

Department of Biology, Faculty of Science and Arts, Cumhuriyet University, 58140, Sivas, Turkey

Received June 2005; accepted for publication March 2007

A new species of *Physoptychis* Boiss., *Physoptychis purpurascens* Çelik & Akpulat, is described from Turkey. The diagnostic characters and description of the species are given. The new species is restricted to inner Anatolia, south-west of Sivas. Observations on the population are presented, together with the World Conservation Union (IUCN) threat category. © 2007 The Linnean Society of London, *Botanical Journal of the Linnean Society*, 2007, 154, 393–396.

ADDITIONAL KEYWORDS: conservation – Cruciferae – taxonomy.

### INTRODUCTION

In 2004, whilst carrying out fieldwork at Deliilyas, around Sivas, central Anatolia for the project on important plant areas along the Bakü–Tibilisi–Ceyhan pipeline in Turkey, we collected specimens of a crucifer which has proved to be a new species of the genus *Physoptychis* Boiss. *Physoptychis* Boiss. comprises two species in the Caucasus, Iran, northern Iraq, and Turkey (Boissier, 1867; Appel & Al-Shehbaz, 2003). Both species are represented in the Turkish flora (Cullen, 1965). *P. haussknechtii* Bornm. is restricted to Anatolia, around Sivas, and *P. gnapholodes* (DC.) Boiss., although now referable to *P. caspica* (Hablitz) V.V.Botschantz (Czerepanov, 1981), is restricted to eastern Anatolia, around Hakkari.

This study describes and illustrates the new species and presents the World Conservation Union (IUCN) threat category.

The specimen evaluated here was identified by comparing the species with the *Flora of Turkey and the East Aegean Islands* (Cullen, 1965) and *Flora of Iraq* (Townsend & Guest, 1980), as well as checking the herbaria of CUFH, ANK, HUB, ISTE, and GAZI.

Specimens of the new species have been deposited in CUFH, ISTE, B, BM, K, W, and C.

### DESCRIPTION

**PHYSOPTYCHIS PURPURASCENS** ÇELİK & AKPULAT, SP. NOV. (FIGS 1, 2)

*Diagnosis:* Affinis *P. haussknechtii* Bornm. sed plantae 10–25 cm (non 1–10 cm), petalis purpureo-roseis (non plavis) differt.

*Type:* [Turkey] B6 Sivas, Deliilyas district, serpentine, chalky steppe and slopes, 1450 m, 39°19'N, 36°47'E, 23.v.2004, Çelik 6232; Akpulat & Dönmez. (holotype: CUFH; isotype: ISTE).

*Description:* Caespitose perennial herb, 15–18 cm, with a slender branching rootstock and numerous lateral sterile rosettes at the densely foliose base, grey with very dense stellate hairs. STEM much branched at base. BASAL LEAVES narrowly spatulate to linear, grey hairy, 25–40 × 3–5 mm, obtuse to subacute; STEM LEAVES narrower, lanceolate to linear. RACEMES densely flowered, to 8 cm long. PEDICELS 3–5 mm; densely grey hairy. SEALS linear-oblong, 3–5 mm, pale margined, ±grey hairy dense stellate hairs. PETALS purple–pink, 6–7 mm; obovate, emarginate at apex. STAMENS 6, long filaments c. 4 mm, short filaments c. 3 mm, anthers 2.5–3.5 mm; STIGMA capitate; STYLE slender and distinct. SILIQUA conical 20–25 × 10–12 mm, grey with dense stellate hairs; SEEDS suborbicular, compressed, 3–4 mm, smooth. SEPTUM thin and membranous.

\*Corresponding author. E-mail: aakpulat99@yahoo.com

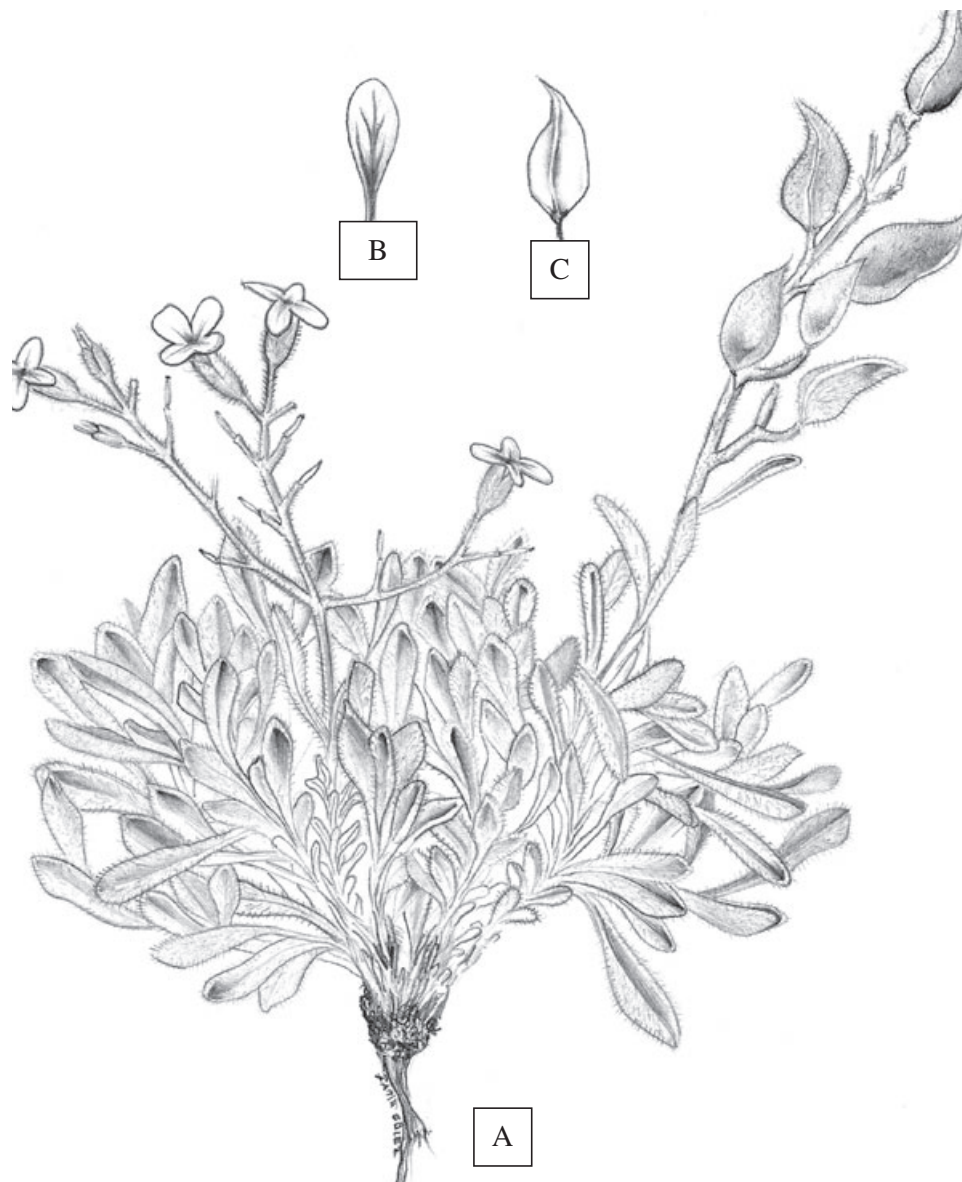

**Figure 1.** *Physoptychis purpurascens* Çelik & Akpulat.

*Phenology:* Fl. 5–7; Fr. 6–8.

*Habitat:* Serpentine, chalky steppe and slopes, 1400–1450 m.

*Distribution and proposed conservation status:* Endemic to Sivas, central Anatolia, of the Irano-Turanian element (Fig. 3). The species is known only from one population at the type locality, and the estimated area of occupancy is less than 10 km<sup>2</sup>. Therefore, it is suggested that this new species should be placed under IUCN threat category ‘Critically Endangered’ (CR) criterion B2 (IUCN, 2001).

*Ecology:* On serpentine, chalky steppe and slopes with the characteristic plants, such as *Bromus tectorum* L., *Bunium microcarpum* (Boiss.) Freyn ssp. *microcarpum*, *Tragopogon coloratus* C.A. Meyer, *Arnebia densiflora* (Nordm.) Ledeb., *Moltkia coerulea* (Willd.) Lehm., *Nonea stenosolen* Boiss. & Bal., *Onosma molle* DC., *Aethionema arabicum* (L.) Andrzej. ex DC., *Alyssum xanthocarpum* Boiss., *Cochlearia aucheri* Boiss., *Conringia perfoliata* (C.A. Mey.) Busch, *Erysimum repandum* L., *Hesperis bicuspidata* (Willd.) Poir., *Neotchihatchewia isatidea* Boiss., *Saponaria prostrata* Willd. ssp. *prostrata*, *Silene ruscifolia* (Hub. Mor. & Reese.) Hub.-Mor., *Convolvulus assyricus* Griseb.,

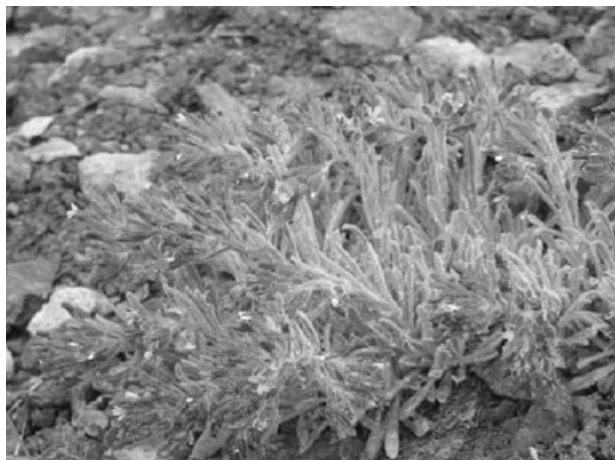

Figure 2. *Physoptychis purpurascens* Çelik & Akpulat.

*Euphorbia denticulata* Lam., *Salvia multicaulis* Vahl., *Atrahaxis grandiflora* Willd., *Ziziphora capitata* L., *Polygonum luzuloides* Jaub. & Spach, *Ranunculus arvensis* L., and *Haplophyllum telephoides* Boiss.

## DISCUSSION

*Physoptychis purpurascens* resembles *P. haussknechtii* and *P. caspica* in Turkey. After obtaining *P. purpurascens* from the collection site (B6, Sivas), the species were compared with each other. After thoroughly studying pertinent specimens and the literature (Boissier, 1867; Appel & Al-Shehbaz, 2003), *P. purpurascens* was found to be related to *P. haussknechtii* and *P. caspica*, but can be distinguished by the characters listed in Table 1. The three species can be distinguished by the following key.

### REVISED KEY TO *PHYSOPTYCHIS* SPECIES IN TURKEY

1. Siliculate rounded at the apex; inflorescence lax..... *P. caspica*
1. Siliculate conical and acuminate at the apex; inflorescence dense
  2. Stem high 10 cm; petals yellow ..... *P. haussknechtii*
  2. Stem high 15–20 cm; petals purple–pink..... *P. purpurascens*

Table 1. Comparison of the diagnostic characteristics of *Physoptychis purpurascens* with those of *P. haussknechtii* and *P. caspica*

| Characteristic   | <i>P. purpurascens</i>                                | <i>P. haussknechtii</i>                               | <i>P. caspica</i>                                      |
|------------------|-------------------------------------------------------|-------------------------------------------------------|--------------------------------------------------------|
| Stem height (cm) | 10–15                                                 | 10                                                    | 8–12                                                   |
| Basal leaves     | Narrowly spatulate to linear                          | Narrowly spatulate to linear                          | Spatulate-obovate                                      |
| Inflorescence    | Dense                                                 | Dense                                                 | Lax                                                    |
| Petal colour     | Purple–pink                                           | Yellow                                                | Yellow                                                 |
| Petal            | 6–7 mm, obovate, emarginate at apex, narrower at base | 6–7 mm, obovate, emarginate at apex, narrower at base | 10–12 mm, obovate, lamina abruptly narrowed to slender |
| Siliculate       | Conical and acuminate at apex                         | Conical and acuminate at apex                         | Rounded at apex                                        |

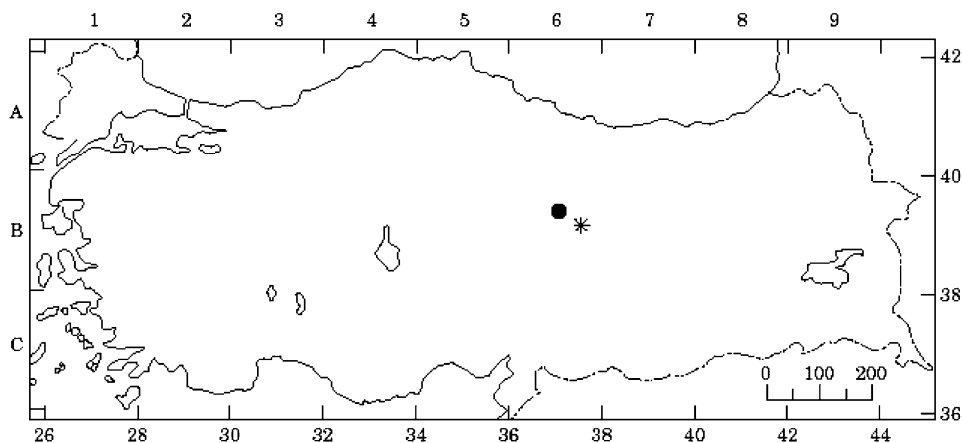

Figure 3. Distribution of *Physoptychis purpurascens* (\*) and *P. haussknechtii* (●) in Turkey.

## ACKNOWLEDGEMENTS

The new variety was collected during fieldwork for the project entitled, 'Important plant areas along the Bakü–Tbilisi–Ceyhan pipeline in Turkey', financially supported by the Environmental Investment Programme of the Baku–Tbilisi–Ceyhan Pipeline Company (BTC Co.). The project is being carried out under the supervision of Professor Dr Neriman Özhatay (Department of Pharmaceutical Botany, Faculty of Pharmacy, Istanbul University, Istanbul, Turkey) on behalf of the University Research and Support Foundation. We thank the artist Fatih Gülez for Figure 3. We also thank Yasar Zongur for his kind help during the collection of plant material.

## REFERENCES

- Appel O, Al-Shehbaz IA. 2003.** Cruciferae. In: Kubitzki K, Bayer C, eds. *The families and genera of vascular plants*. Berlin: Springer, 75–174.
- Boissier E. 1867.** *Flora Orientalis*, Vol. 1. Geneva and Basle: 160.
- Cullen J. 1965.** *Physoptychis*. In: Davis PH, ed. *Flora of Turkey and the East Aegean Islands*, Vol. 1. Edinburgh: Edinburgh University Press, 356.
- Czerepanov SK. 1981.** *Plantae vasculares URSS*. Leningrad: Nauka, 141.
- IUCN. 2001.** *Red list categories*, Version 3.1. Gland: IUCN Species Survival Commission.
- Townsend CC, Guest E. 1980.** Cruciferae. In: Townsend CC, ed. *Flora of Iraq*, Vol. 4(2). Baghdad: Ministry of Agriculture, 949–951.
